# Supplementary material for: Utility of G protein-coupled oestrogen receptor 1 as a biomarker for pan-cancer diagnosis, prognosis and immune infiltration: a comprehensive bioinformatics analysis
Source: Aging (Albany NY). 2023 Nov 2;15(21):12021–67. doi: 10.18632/aging.205162 (PMC10683611; doi:10.18632/aging.205162)
Supplement: Supplementary File 1 [file aging-15-205162-s007.xlsx]

## Sheet: Sheet1
Supplementary File 1. All differentially expressed genes (DEGs).
Cancer type	gene_name	log2FC	p.adj
BRCA	TNMD	1.33262	1.53938e-23
	HSPB6	1.05435	3.55598e-25
	SOX8	-1.17523	3.02934e-16
	PROM1	-1.28053	4.56944e-18
	PAX7	-1.02996	8.50701e-05
	IYD	-1.07557	1.93579e-11
	GABRA3	-1.55995	9.93848e-12
	ATP1A2	1.73292	4.05304e-46
	FHL1	1.01142	1.72812e-36
	ABCC2	-1.1135	7.3694e-27
	MYOC	1.8262	9.99308e-26
	OTC	1.33819	4.83099e-11
	SLC18A1	1.55013	3.3568e-29
	CP	-1.47419	7.64944e-22
	TNIP3	-1.42155	5.91373e-34
	PHF21B	1.3049	9.68226e-16
	ARSF	-1.27702	6.78398e-14
	SEZ6	2.59779	2.54022e-56
	CHI3L2	-1.07766	5.9258e-17
	ROPN1	-1.41225	3.41918e-10
	NAV3	1.41642	3.93275e-42
	ADAM7	-1.04585	0.00619331
	GAL	-1.07502	4.35075e-14
	CDH19	-1.73852	4.5867e-14
	SLC6A15	-2.01991	8.54728e-23
	IGF2BP2	-1.03603	1.28456e-17
	SLC12A1	-2.04857	2.20444e-43
	FGF4	2.1096	6.01013e-06
	ACTL6B	1.86512	1.69317e-20
	CAPN6	-1.08116	5.87265e-12
	LIPE	1.21213	5.66024e-41
	CDH7	1.6535	3.72436e-20
	LRP2	1.13574	1.53378e-14
	IL12RB2	-1.33977	9.89605e-24
	OPRK1	-1.08349	1.9937e-07
	LINC01587	-1.0236	7.45249e-11
	APOB	1.15867	8.81973e-17
	HSD17B2	-1.14487	2.83913e-14
	SLC15A1	-2.02504	9.52252e-31
	CHGB	5.6797	2.19807e-172
	CPA1	1.40594	1.93666e-26
	VNN3	-1.85129	1.35716e-27
	GABRP	-1.29613	1.40724e-13
	TDRD1	-1.1921	3.46992e-12
	KCNK16	1.28125	3.27238e-05
	CRISP3	-1.1394	1.07977e-08
	SEZ6L	1.75221	6.88111e-28
	PVALB	1.05912	1.06499e-07
	CHGA	4.43643	1.06573e-98
	RIMS4	1.01882	1.32122e-11
	COL20A1	1.0803	5.2119e-13
	SEL1L2	1.24043	2.38438e-18
	ANGPT4	1.09684	6.6096e-38
	PROKR2	-1.55001	3.01599e-07
	HAO1	-1.77273	5.29687e-08
	BPI	-1.25629	1.04047e-16
	CST9L	1.06705	1.71209e-05
	F9	-1.53686	0.000316552
	SYP	1.1173	1.94659e-23
	VGLL1	-1.52997	1.12755e-13
	SGCG	1.27713	1.21081e-20
	ACOD1	-1.38276	5.42664e-16
	OLFM4	-1.71273	8.08617e-20
	MSLN	-1.26687	2.44955e-12
	ZP2	-2.45921	4.74217e-26
	PRSS33	-1.54289	1.2676e-08
	PLAT	1.22565	1.18973e-38
	FGL1	-1.02368	4.39219e-10
	CASP14	-1.39287	1.23336e-09
	SLC1A6	-1.47088	2.09842e-12
	FGF21	-1.7809	1.42057e-07
	VIPR2	1.04024	2.89429e-13
	GHRHR	-1.19196	5.38265e-12
	GCK	1.05128	5.40255e-31
	DKK1	-1.05701	4.83966e-11
	RUNDC3A	1.83212	2.08332e-46
	CSF3	1.07234	3.01523e-09
	CCL7	-1.18832	3.82047e-12
	PHOX2B	-1.1941	0.00340303
	UGT2B10	-1.49846	1.4227e-08
	ODAM	-1.61039	5.86658e-16
	SMR3A	-3.38533	2.46507e-10
	UCP1	2.19521	2.71105e-34
	PPARGC1A	-1.01327	3.63117e-17
	DDX25	1.02703	2.5595e-20
	MYF6	2.21945	3.44496e-20
	PRMT8	1.22672	1.70563e-16
	ART4	1.01802	2.28312e-16
	IFNG	-1.04567	1.17831e-13
	PRDM13	-1.41813	3.26413e-05
	C7	1.30328	6.87448e-22
	GABRG2	1.93743	8.8225e-08
	ROPN1B	-1.30611	1.21785e-14
	PEX5L	1.42511	1.55851e-23
	CCL20	-1.40587	2.21659e-31
	GCG	1.74092	0.000106985
	REG1A	-1.79803	0.00043534
	PRKAG3	-1.21945	1.20859e-11
	DLX2	1.62602	7.26311e-23
	LCT	-1.51008	7.15008e-20
	KYNU	-1.18283	2.96645e-26
	TPSG1	1.22821	1.94217e-14
	HAO2	1.51203	8.96886e-25
	PADI2	-1.32041	2.16397e-34
	ACTL8	-1.02564	6.96335e-07
	FMO6P	-1.84551	2.33795e-25
	CASQ2	1.00016	1.99181e-25
	OLFM3	1.81775	5.17153e-11
	RARRES1	-1.59639	5.87198e-36
	PRLHR	1.34059	1.20052e-10
	KCNIP2	1.28762	3.81174e-43
	GRIA2	1.28829	1.46424e-09
	MAGEB4	-1.95544	1.05509e-12
	RDH10	-1.15372	6.301e-30
	BCL2L14	-1.04687	1.58795e-20
	NPY	1.30796	3.15616e-06
	AKR1D1	-1.3974	1.58546e-22
	ITIH5	1.072	1.2414e-39
	ESX1	-1.69235	4.41907e-05
	G0S2	1.00632	2.85801e-20
	C4BPA	-1.10242	1.04594e-11
	PI3	-1.52777	2.2748e-16
	SLPI	-1.52268	1.51158e-26
	KCNS1	-1.0704	5.74899e-14
	PCK1	1.26191	4.4633e-15
	MAGEA10	-3.70815	3.51495e-26
	CRISP2	-1.31605	3.89701e-09
	GRIA3	1.20842	4.79723e-31
	FOXA2	-1.28914	5.95436e-07
	CITED1	1.45913	1.47296e-26
	FFAR1	1.24569	2.97874e-16
	STATH	-1.82495	0.00468026
	HTN1	-1.60447	0.00168683
	SSX1	-1.80018	3.01116e-05
	AVPR2	1.24766	6.42207e-46
	CPA4	-1.03271	7.50223e-16
	CDHR3	1.35207	2.55571e-37
	KCNC1	1.28822	1.99879e-18
	TPH1	2.05946	7.54094e-64
	CSRP3	1.61439	6.88616e-11
	KLK14	-1.22462	1.17506e-15
	KLK8	-1.12556	4.20547e-09
	LBP	-2.52213	1.71551e-52
	ANGPTL8	1.11576	2.11028e-23
	ACE2	-1.92777	1.12573e-36
	NCAN	-1.96808	1.91938e-22
	CACNG6	1.22872	5.53411e-08
	UNC13A	1.45853	7.65232e-33
	KLHDC7B	-1.23165	2.78225e-20
	TNNT3	1.16466	7.15775e-22
	CALY	1.07182	1.55058e-12
	SLC7A10	1.02515	5.89408e-14
	BPIFA2	-1.24627	2.39226e-06
	GFAP	1.00019	2.7917e-15
	IDO1	-1.47695	5.13567e-30
	BARX1	-1.07841	4.24385e-13
	CA6	-2.12637	8.26111e-22
	PPP1R1B	-1.25433	2.3848e-16
	LIN28A	-1.91266	6.58555e-16
	RTBDN	1.33152	4.30868e-16
	SNAP25	1.6267	9.68736e-37
	SYT4	1.95652	9.01736e-09
	SLC14A2	1.08573	2.36913e-21
	GPR12	-1.62287	4.80658e-17
	CHI3L1	-1.1199	2.22686e-17
	DCLK1	1.12119	2.08186e-27
	IRS4	1.07925	2.60124e-06
	MYH11	1.01843	2.39263e-24
	NTS	2.84559	2.10043e-30
	VRTN	-1.45072	2.01561e-08
	SOX3	1.30598	2.5773e-07
	TCN1	1.67506	3.33322e-21
	CLDN10	-1.35415	5.0949e-19
	PSAT1	-1.22708	1.9215e-20
	CSN2	-6.77626	5.189e-41
	ADGRB3	1.07062	1.41877e-25
	ELF5	-1.43904	7.47981e-19
	LACRT	2.00323	2.7923e-08
	ITGA7	1.02712	1.38184e-43
	RDH5	1.05316	8.03899e-42
	SLC19A3	1.16127	3.51375e-19
	PCDH8	-1.07479	3.26194e-09
	SCEL	-1.08408	6.45187e-07
	IGF2BP3	-1.25308	9.50974e-17
	CHAD	1.06377	5.90786e-14
	GABBR2	-1.30692	9.68166e-11
	NR5A1	1.10662	3.74293e-08
	MMP20	-1.51673	2.87738e-15
	UNC13C	1.04868	4.11281e-17
	CLCA2	-1.06058	2.01124e-08
	LHCGR	1.28039	1.19604e-10
	PCDH10	1.37711	1.23548e-15
	NDST4	1.8136	2.68197e-12
	MMRN1	1.04514	1.18588e-21
	PTPRQ	1.01123	6.69735e-10
	ASCL1	1.10611	1.12136e-05
	PDX1	-1.48343	4.47281e-05
	SRRM4	1.08639	7.27871e-10
	GCNT3	-1.159	2.3253e-20
	RHCG	-1.18833	1.3109e-12
	RLBP1	-1.14033	8.6807e-08
	ABCC12	-1.12925	2.10724e-09
	MYOCD	1.05282	3.57938e-27
	ABCA8	1.05547	5.92903e-23
	CBLN2	1.23327	1.12636e-09
	PNMT	-1.06331	1.61771e-10
	KLK3	1.35997	3.73822e-10
	PADI3	-1.23608	1.9168e-13
	C1orf94	-1.21967	2.39117e-05
	DMRTA2	-1.08338	1.13063e-07
	PRKACB	1.04843	1.24381e-25
	PROK1	1.03265	4.86461e-11
	HORMAD1	-1.73528	3.33369e-17
	CRNN	-1.12124	0.00451451
	S100A8	-1.59479	2.24997e-21
	S100A7	-1.21737	2.22897e-06
	TRIM43	-1.18161	0.00123163
	TMEFF2	1.05637	2.9491e-10
	TRPM8	-1.81535	4.28645e-35
	LRTM1	1.06042	6.43141e-06
	SPATA16	-1.92621	1.77807e-08
	GC	-1.15996	0.00407479
	GLRA3	1.52868	5.24913e-13
	CPLX2	2.89432	6.7378e-25
	GFRA3	-1.12505	6.86092e-13
	RASGEF1C	-1.34536	4.60444e-18
	CLVS2	2.78659	9.60465e-43
	PNLDC1	-1.03751	4.04779e-15
	ASB15	1.46315	2.11439e-18
	STRA8	-1.80191	7.17168e-12
	AWAT2	-1.80529	5.19651e-26
	ARHGAP36	2.23273	3.64597e-22
	MAGEA4	-3.45253	6.4769e-21
	CHRNB3	1.04808	7.3966e-06
	NTRK2	1.06586	8.08712e-20
	LCN2	-1.38044	1.06112e-18
	SLC39A12	-1.69733	2.36655e-17
	VAX1	-1.78555	2.43053e-09
	GLYAT	1.70152	1.14362e-28
	HTR3B	-1.03166	0.00336484
	ADAM33	1.08231	1.10389e-31
	MSGN1	-1.55408	2.97263e-08
	POU4F1	-1.24751	9.06554e-07
	OLAH	-1.7649	7.84783e-28
	ZIC1	-1.00044	7.17771e-08
	CPB1	3.47903	2.7838e-53
	ADGRF1	-1.40526	2.5834e-20
	FRMD1	1.07491	4.71629e-21
	ANKRD29	1.02557	1.52323e-32
	ENPP3	-1.45322	6.3351e-41
	ASZ1	-1.29575	1.96594e-05
	GBP5	-1.027	8.44555e-21
	CA10	-1.44673	3.7546e-09
	PTPRN2	1.13623	6.66946e-19
	MAGEC1	-1.45303	1.48507e-10
	GRIA1	2.36442	7.1225e-41
	XAGE2	-2.31384	4.17099e-09
	ART3	-2.29895	5.6489e-33
	UNC5D	1.43015	1.93131e-12
	GLYATL2	-2.19636	2.47256e-46
	SST	1.32828	7.2105e-05
	LYZL4	-1.02179	2.04092e-07
	TIMP4	1.62627	1.55131e-43
	SLC34A2	-1.56718	3.61225e-22
	TMSB15A	-1.0847	3.86095e-18
	CHRNB2	1.03596	5.57208e-14
	DCD	-1.48265	3.05915e-06
	CD300LG	1.74213	3.50106e-38
	AQP5	-1.40076	5.24569e-14
	FGF19	1.04099	9.69345e-11
	LRRC53	2.64362	4.36619e-20
	BRINP3	-1.55966	6.64436e-09
	FCRLB	1.08385	1.21636e-17
	NEUROD1	2.61316	1.03258e-09
	XIRP2	2.04202	1.67963e-17
	SPRR3	-1.01247	0.000985762
	PGLYRP4	-1.39131	5.81176e-12
	S100A9	-1.45825	2.12241e-19
	GABRG1	1.1231	5.68679e-13
	IGFN1	1.3742	4.53927e-26
	PDCL2	-1.19221	0.000162545
	FEV	1.11444	1.42809e-09
	SLC2A2	1.49555	8.14264e-05
	NKX6-1	1.04632	2.91657e-18
	CXCL5	-1.47992	4.05637e-19
	CXCL1	-1.03159	9.4728e-13
	TCF23	1.21391	2.47541e-29
	RTP3	-2.76834	3.73526e-24
	CAMKV	-1.20277	3.59663e-11
	ASB5	1.10089	1.75091e-07
	NPY1R	1.02199	5.94603e-09
	NPY5R	1.14318	2.51555e-09
	SPZ1	-1.05344	0.00844783
	CARTPT	5.15438	6.23852e-41
	FABP7	-2.60336	9.64734e-34
	TLX3	-1.29862	0.00146161
	IL22RA2	-1.25238	3.93545e-15
	BMPER	1.42247	1.35931e-37
	DEFB1	-1.42339	5.25127e-22
	CPA6	1.06807	6.02572e-10
	TRPV6	-1.00812	3.9909e-15
	PTCHD1	-1.06677	5.27981e-12
	VEGFD	1.06486	4.09462e-20
	AQP7	1.68168	3.58541e-40
	SLC7A3	1.04217	2.30331e-11
	HEPACAM	1.56448	7.13736e-26
	SSX3	-1.73415	0.0008271
	OXGR1	-1.46457	1.31253e-22
	SOHLH1	-1.17022	4.79897e-08
	BTNL9	1.07703	2.31877e-35
	CACNB2	1.23354	5.24403e-39
	KCNC2	2.10311	3.09603e-15
	SVOP	1.30459	1.3408e-09
	LRTM2	1.24965	5.52519e-13
	SYNPO2L	1.00603	7.36551e-10
	SERPINB7	-1.48384	6.86186e-22
	CRABP1	-1.29005	9.32235e-12
	A2ML1	-1.05248	5.84449e-09
	HTR3A	-1.16755	4.24618e-12
	PLIN1	1.66269	4.69872e-37
	MS4A6E	1.0477	5.27026e-07
	MS4A8	1.00063	6.28892e-08
	TERB2	-1.05182	0.00298167
	B4GALNT2	-1.49461	3.23804e-21
	UGT1A6	-1.412	3.28646e-05
	MMP26	1.93071	7.37919e-06
	CA4	2.03877	3.45845e-39
	LALBA	-6.07296	6.29612e-44
	CORO6	1.53078	4.86979e-31
	GPD1	1.72145	7.1894e-40
	TTYH1	-1.04012	1.94311e-11
	PLIN4	1.77759	3.10667e-44
	KLK6	-1.5277	2.33127e-16
	KRT1	2.43886	2.46905e-47
	TBX10	-2.35356	4.97259e-24
	SCARA5	1.00011	1.40678e-12
	PPDPFL	-1.32656	0.00502515
	TNXB	1.17244	4.77e-37
	CAVIN2	1.19568	9.24966e-38
	MYL1	2.1354	3.72943e-05
	ADAM18	1.15938	3.6655e-05
	WFDC13	1.03797	3.50253e-08
	HTR1E	1.25665	4.90644e-08
	ATOH8	1.21789	5.20064e-43
	VXN	-1.03603	7.07369e-18
	CXCL10	-1.15124	1.00371e-25
	CXCL11	-1.02143	1.31806e-19
	NR0B1	1.21801	2.95704e-06
	OR5AU1	-1.19994	0.000241073
	GP2	1.02133	1.52509e-08
	MUC15	-1.02177	2.25307e-09
	NSG2	2.07416	3.65885e-38
	SERPINA6	1.36647	3.04158e-08
	FABP6	-1.09374	2.36442e-09
	MRAP	1.48917	1.2235e-28
	FABP4	1.65081	9.81022e-32
	VSTM2A	1.16045	2.28673e-05
	KRT86	-1.11291	2.21382e-19
	KRT4	-1.14246	6.93192e-07
	HSD17B13	1.21496	1.17889e-29
	GTSF1	-1.04741	4.12972e-24
	TRH	3.20348	9.84432e-66
	FUT3	-1.35519	2.75718e-21
	GRIK1	1.22315	2.68576e-23
	SMR3B	-4.71073	3.62543e-42
	CSN3	-3.33679	5.28682e-19
	UGT2B7	-2.11276	8.57275e-29
	KCNK3	1.68552	8.02984e-35
	KRT13	1.74219	1.31752e-17
	KRT20	-2.50253	2.77914e-26
	CDK5R2	1.23543	1.18593e-09
	FGG	-3.67016	1.21341e-45
	FGA	-2.7253	4.82746e-17
	FGB	-2.30544	5.06684e-18
	MAB21L4	-1.5294	1.99715e-23
	MUCL1	-1.37035	5.88971e-12
	COL6A5	-1.04457	3.01581e-12
	DELEC1	1.22319	4.35883e-19
	C11orf86	-1.46376	2.83967e-08
	CST9	1.11977	8.48187e-06
	INSM1	1.25617	1.58327e-11
	DAB1	1.34807	1.20788e-27
	TMEM196	1.14969	0.000933793
	NLRP13	1.19968	6.77668e-07
	UGT2A1	1.69876	5.19809e-06
	HSPB7	1.3293	1.37571e-50
	SPATA3	-2.16129	1.15614e-16
	TDRD12	-1.26883	2.36655e-17
	VWC2L	1.41759	3.26598e-14
	SLC26A9	-1.17852	2.81082e-12
	UGT8	-1.01293	2.44679e-11
	GRIK1-AS1	1.13309	4.12434e-14
	LEP	2.30648	1.37077e-46
	DES	1.299	2.35717e-22
	ANKS4B	-1.50677	4.57182e-19
	ISX	-2.45586	1.74854e-18
	PCSK1	3.14944	9.34319e-89
	FOXG1	-1.54823	3.3955e-11
	CIDEA	1.58426	2.38004e-22
	PRR18	-1.12579	3.07555e-12
	NANOGP1	-1.31089	2.17357e-09
	MAGEB6	-1.59919	2.74052e-06
	MIR7-3HG	1.05307	5.10091e-05
	SOX11	-1.43924	5.69551e-25
	ZDHHC22	1.34821	6.03257e-13
	C10orf71	1.18055	0.000340439
	AC024940.1	-1.01871	5.47594e-12
	UMODL1	-1.00411	3.9189e-17
	UBE2U	-1.57069	3.5844e-06
	ERICH5	-1.09193	1.87268e-11
	NHLH2	1.5668	8.98006e-27
	AMER3	3.07447	9.07465e-40
	C5orf64	1.06145	1.12418e-17
	STX19	-1.16963	4.34211e-24
	ZFP42	-3.34346	1.47698e-46
	TAAR3P	-1.28448	0.000676698
	LINC00670	1.10652	9.61357e-10
	ABCA13	-1.56478	3.20026e-18
	NRXN1	1.07794	6.32396e-13
	ADGRD2	1.53969	3.7159e-17
	WFDC10A	1.12754	4.13572e-06
	ALX1	-1.05374	1.33834e-08
	ITPRID1	-1.73947	9.89605e-24
	LINC01559	-1.08745	6.2787e-08
	OR52N2	-1.04593	4.84091e-08
	C1orf105	-1.23505	5.03685e-17
	ADIPOQ	1.53755	9.646e-20
	TMEM132C	1.57576	1.78457e-29
	C6orf223	-1.20588	1.22094e-16
	FDCSP	-1.60759	5.3744e-15
	FTMT	-1.29733	0.000138133
	AQP7P2	1.67215	1.76472e-14
	TMIGD1	-1.34156	8.6028e-05
	EPGN	-1.0272	3.33665e-12
	GSTA5	-1.70086	4.01363e-17
	PLCXD3	1.1535	1.1925e-18
	TMEM95	1.18865	7.21609e-11
	TCHHL1	-1.05647	0.00311173
	FAM9A	-1.29084	0.00348238
	URAD	1.28724	1.68303e-10
	GKN2	1.6178	3.13931e-09
	MARCHF11	1.23185	1.97325e-07
	CLDN5	1.21244	2.73721e-46
	S100A7A	-1.8001	1.2872e-09
	OR56A3	-1.12668	0.0060581
	C14orf180	1.92053	1.89416e-29
	RALYL	1.68975	1.50412e-11
	CLDN6	-1.14187	6.76473e-12
	TRARG1	1.95075	2.09123e-31
	ROBO2	1.02663	1.12505e-10
	NPY2R	2.0951	1.62247e-17
	DLK1	-2.49298	1.2027e-21
	BPIFB3	-1.49742	0.00835484
	TRDN	1.35752	1.67256e-18
	DEFB132	1.04316	2.16889e-12
	AQP7P1	1.17417	6.59061e-17
	LINC01551	-1.08354	0.000648758
	TMPRSS6	1.10226	8.44585e-17
	SLIT1	1.43906	3.60714e-26
	FAM9C	-1.14534	9.73912e-09
	CIDEC	1.84761	4.07243e-33
	HSD3BP1	-1.21195	0.00528961
	PLEKHG7	-1.27643	1.41669e-17
	PRR27	-2.59172	6.24609e-10
	AMTN	-1.79125	4.58838e-18
	EZHIP	-2.06402	4.30743e-18
	ADH1A	1.13838	2.45729e-15
	LIN28B	-1.73301	1.48858e-05
	HELT	-1.37823	0.000114384
	P2RX2	-1.02568	4.94549e-09
	DMBT1	-1.16714	1.31519e-13
	LCN10	1.67242	3.25997e-27
	NCCRP1	-1.435	9.18918e-20
	KRTDAP	1.45959	3.87266e-17
	AC010969.1	1.08224	1.78615e-10
	NANOS1	-1.12054	5.09401e-36
	OPTC	1.14215	3.74806e-08
	TMC3	1.56819	9.49392e-27
	AADACL3	1.33172	9.29233e-06
	HUS1B	1.05947	9.24852e-13
	RNF222	-1.16037	1.7464e-17
	PLAC9	1.00151	8.58684e-32
	CXCL17	-1.44832	1.66502e-19
	MMP23B	1.00984	4.67794e-21
	MYBPC1	-1.04454	3.16416e-08
	MYT1	1.07367	1.24067e-12
	SULT1C3	-1.67855	0.00252316
	PRSS29P	1.25691	9.24443e-16
	AL138767.1	-1.005	5.69269e-06
	MMP1	-1.11077	1.36388e-13
	ADH1B	1.48358	2.64391e-20
	FAM180B	1.14263	2.55208e-20
	ALKAL1	-1.1173	0.000112178
	OR14A16	-1.2053	0.00917047
	LCE1C	1.35233	6.52173e-08
	MAGEA6	-2.34917	1.29668e-07
	CYP2F1	-1.68036	9.23547e-21
	SLC22A12	2.23071	1.12145e-22
	CYP2A7	1.34369	1.25628e-09
	BPIFA1	-2.46555	1.1955e-11
	B3GNT6	-1.02711	2.08295e-06
	FAM3D	-1.82798	1.84097e-38
	PPP1R14C	-1.36766	1.49304e-19
	LRRTM3	1.43332	7.28121e-08
	MUC2	3.39391	9.48674e-52
	CSAG1	-2.3224	1.46128e-22
	MIR126	1.11423	6.23951e-14
	RNU5E-1	-1.89189	2.67128e-23
	SNORA73B	-2.56232	1.58215e-78
	RNU1-19P	-2.18142	3.60588e-05
	RN7SKP255	-3.62787	6.22613e-16
	RN7SKP203	-2.94823	2.49784e-07
	SNORA80A	-1.04612	0.00398419
	RNU6-681P	-1.59815	0.000791567
	SNORA74A	-1.22566	1.19427e-06
	RNU5A-8P	-1.43967	0.00060027
	RN7SKP71	-1.61555	7.69491e-05
	RN7SKP9	-1.08928	0.00117109
	SNORA23	-2.48782	8.35293e-42
	AL162581.1	-2.21086	9.9209e-55
	LINC02487	-1.59981	8.52698e-23
	LORICRIN	1.37654	4.42837e-12
	KPRP	1.41084	0.000297494
	PNLIPRP3	-2.35075	1.48709e-12
	HSD3B2	1.2647	7.02664e-12
	CHIAP2	1.52718	4.68188e-06
	GLYATL3	-1.45262	0.000936633
	CT83	-1.59398	0.00141854
	MCCD1	1.36563	1.45426e-08
	MOG	-1.90603	5.79065e-20
	MALRD1	1.52859	2.15685e-18
	CD177	-1.01689	7.71852e-10
	OR5G5P	-1.05079	0.0015898
	CLLU1-AS1	-1.15116	4.59126e-11
	AC005863.1	-1.79994	3.04625e-16
	MT1H	-1.02953	1.53711e-13
	MT1A	1.14268	8.26522e-18
	KRT81	-1.55318	3.4212e-17
	ADARB2-AS1	-1.51121	1.15563e-05
	CLEC6A	-1.14711	2.14783e-13
	C18orf63	-1.20014	4.65501e-07
	SERPINB11	1.9364	4.40291e-05
	SERPINB4	-1.40383	1.37424e-05
	RNVU1-7	-1.69186	9.1932e-17
	RNU1-11P	-3.48795	1.02311e-11
	Y_RNA	1.00896	0.00636382
	RNU6-1042P	-1.05836	0.00387834
	SNORD116-13	-1.36678	4.72209e-07
	AC016813.1	1.12749	8.93515e-06
	SNORA20	-1.24259	2.40651e-12
	SNORD15B	-2.60281	2.23377e-76
	IGLV4-69	-1.00814	7.64578e-11
	IGLV1-47	-1.03791	4.15955e-12
	IGLV3-21	-1.02525	8.33109e-12
	IGHM	-1.053	1.1525e-12
	IGHD3-3	-1.10183	1.09769e-07
	IGHV6-1	-1.45758	1.90276e-19
	IGHV1-3	-1.19647	8.67042e-12
	IGHV3-11	-1.03523	2.6794e-12
	IGHV1-18	-1.33387	1.69991e-17
	IGHV3-21	-1.2481	1.8984e-16
	IGHV3-23	-1.20802	4.21912e-17
	IGHV2-26	-1.13767	6.54479e-12
	IGHV3-73	-1.42519	1.00509e-20
	SNORA74B	-3.09601	5.38089e-58
	SNORA12	-1.47325	1.87123e-27
	KRTAP3-3	1.26804	3.85048e-05
	Z97192.1	1.13369	5.443e-08
	ACKR1	1.27368	2.91715e-25
	EEF1DP5	-1.1288	2.19422e-08
	CSH2	-1.45669	0.000177164
	MAGEA12	-2.273	2.80978e-11
	CYP2A7P1	1.86995	5.54287e-07
	UCA1	-1.3287	1.44282e-22
	MAGEB1	-1.20648	0.00099458
	TMEM213	-1.02962	3.28117e-09
	GNAT3	-3.52968	5.70531e-19
	AC087491.1	-1.32732	1.87905e-20
	PGGT1BP2	-1.03343	3.35155e-09
	SLC6A10P	-1.32562	3.27968e-08
	LINC01913	-1.54668	1.22907e-05
	FER1L6	1.29349	8.56788e-24
	DCDC2C	1.25817	9.77114e-10
	PRSS41	-1.46898	8.78268e-06
	MUC5AC	1.22638	3.21701e-09
	C1orf167	1.05428	1.87578e-11
	IGSF23	-1.19189	1.1358e-12
	GPR89P	-1.02251	2.16647e-08
	AC073263.1	-1.14372	2.16748e-25
	AL121949.1	-1.07243	3.09811e-06
	AL592429.1	-1.42203	5.51649e-20
	AL512378.1	1.13188	7.74994e-14
	AL355796.1	-1.0698	1.05473e-08
	SNORA11B	-1.09172	0.000373189
	MIR1180	1.12503	2.42718e-08
	MAGEA3	-2.57968	1.47636e-09
	TAS2R40	-1.12525	5.84872e-05
	AC005481.1	1.02447	8.56489e-18
	AL031587.1	-1.00822	7.96279e-09
	RN7SKP8	-1.40299	0.00276801
	RNA5SP107	2.36372	4.37988e-05
	AL158817.1	-1.24731	0.000412256
	KLF2P3	1.30672	7.89556e-06
	CLDN10-AS1	-1.89784	4.80918e-07
	AL391097.1	-1.21717	0.00377691
	AL357033.2	-1.07032	0.000394877
	LINP1	-1.25423	4.22861e-07
	LINC01014	-1.73428	6.31796e-08
	EGFR-AS1	-1.285	3.39271e-10
	LINC01248	-1.00529	0.00444168
	VSTM2A-OT1	1.08963	0.00130408
	SOX1-OT	-1.79294	0.00136599
	AC073508.1	1.25115	1.11604e-08
	LINC01133	-1.32099	6.03217e-16
	PINCR	1.03314	0.000180258
	AL136234.1	-1.47296	1.55875e-10
	IGHV4-59	-1.0414	1.6069e-12
	AL591686.1	1.3733	8.0389e-15
	AC010907.1	1.05331	0.000702207
	AC009227.1	1.2598	1.16174e-09
	MED15P4	1.25125	1.35591e-08
	AL034349.1	1.02185	0.000167928
	AC010789.1	-1.85956	6.48434e-05
	LINC00393	-1.5721	2.87342e-05
	AL513318.1	-2.36478	1.76853e-15
	NDUFA5P10	1.34573	2.89408e-07
	PGM5-AS1	1.30877	1.25925e-18
	PPP4R3C	-1.58072	0.00380811
	AL021026.1	-1.21563	3.61385e-12
	PSLNR	-1.85704	8.7029e-10
	ATP6V0E1P1	-1.05071	0.000399423
	GBP1P1	-1.04459	1.3889e-23
	AL606519.1	-1.27007	4.346e-07
	EIF2S2P5	1.08194	0.00343828
	CADM3-AS1	1.27221	8.96886e-25
	LINC02620	-1.19524	7.06182e-13
	AC007953.1	-1.3191	4.77834e-13
	GS1-594A7.3	-2.192	1.96897e-14
	AL022315.1	-1.17645	1.37071e-09
	HSPE1P13	-1.26199	0.000101525
	AL138767.3	-1.01806	3.3899e-15
	HAR1A	1.76096	1.03389e-44
	MTND4P32	-1.24129	0.000251698
	AC244107.1	-1.63393	0.00210058
	NPY6R	1.29079	6.50494e-19
	ST7-AS2	-1.16901	2.66935e-11
	DCAF8L1	-1.41867	0.00250069
	ADIPOQ-AS1	1.21379	1.13942e-08
	RPL39P40	-1.05246	6.90468e-10
	AL138826.1	-1.57671	0.000215927
	AC114501.1	1.08353	4.22829e-08
	LINC00348	-1.69001	5.40297e-05
	AC135178.2	1.05596	1.33576e-18
	LINC01276	-1.08555	2.60703e-07
	AL365184.1	1.49498	1.39752e-06
	PDZPH1P	1.38363	3.56148e-16
	OR7E101P	-1.09193	0.00239925
	SPANXB1	1.82766	1.79803e-12
	FAM155A-IT1	-1.00925	0.00163304
	LINC01985	1.0705	6.99047e-13
	AC010998.1	-1.0692	0.000873403
	AL445686.1	-1.03967	0.000145963
	AF130417.1	1.55797	0.00053999
	H3P9	-1.03367	0.000212711
	AKR1B15	-1.34585	1.8643e-21
	AC004986.1	1.66991	7.23125e-06
	AP003385.1	-1.18731	1.74379e-05
	SELENOOLP	-2.62032	7.01349e-08
	NGF-AS1	1.28139	1.30356e-14
	LINC00578	-1.20482	4.18861e-20
	ORM2	-2.65616	2.71684e-52
	AP000593.2	-1.07608	1.46247e-05
	LINC00392	-1.9346	0.00750241
	AC106873.1	-1.91044	5.49373e-12
	LINC01768	1.33919	3.29167e-10
	AC106875.1	1.7432	1.02988e-10
	OR7E26P	-1.47126	2.11775e-11
	AL033519.4	1.09946	2.88556e-13
	AC026355.2	-1.17028	1.05309e-12
	ROCR	-1.05049	2.76015e-07
	AL023755.1	-1.54015	2.20463e-08
	HOMER2P1	-1.19022	6.49249e-05
	SUMO2P8	-1.3994	6.21476e-08
	AL451048.1	1.20826	0.00509419
	ORM1	-2.56547	1.16859e-41
	SPINK8	-1.35089	2.70428e-16
	FO681548.1	-1.01695	1.29456e-08
	LINC00404	-1.77331	0.00289545
	NKX1-2	-1.88166	3.4212e-17
	LINC01079	1.45644	7.40121e-05
	AL022337.1	1.07618	0.00203355
	AC140481.1	1.42137	0.00136955
	AC080129.1	-1.05443	0.00010928
	MAGEA4-AS1	-2.43541	8.75593e-06
	GTF3AP6	1.49604	0.000528968
	AC006357.1	-1.75458	2.31474e-08
	AC108025.1	-1.39368	2.83117e-06
	SIAH1P1	1.20702	0.00990513
	PHBP4	-1.1826	6.27296e-06
	NFE4	-2.39922	1.53541e-26
	AL356234.2	-1.31987	8.34969e-13
	KLF2P2	1.035	3.84761e-10
	SRGAP2-AS1	1.00551	2.77628e-07
	AL391807.1	1.0712	1.53147e-15
	LINC02522	-1.09811	0.00107112
	LINC01436	-1.09184	4.55105e-15
	LNCAROD	-1.02253	1.74467e-10
	HAR1B	1.67837	3.08054e-27
	AL772284.1	-1.84978	1.62749e-12
	RPL7L1P2	1.30486	4.83501e-05
	LINC02015	-1.25504	3.70634e-17
	AL353747.3	-1.20953	0.000478902
	LINC01198	-1.50986	1.87524e-10
	AC116666.1	-1.33118	0.00249975
	PGM5P4-AS1	1.40402	2.78609e-24
	AC011899.1	1.362	3.13026e-08
	SILC1	-1.7178	2.26545e-19
	NCOA7-AS1	1.33558	1.51618e-05
	LINC01873	-1.32729	4.27934e-06
	AL662889.1	1.36835	0.00874394
	AL353613.1	-1.1106	0.00559142
	AL122034.1	-1.46887	7.54771e-07
	AL158829.1	-1.22322	8.17203e-07
	PHGR1	1.87558	6.60195e-22
	AL513304.1	-1.01037	8.07743e-05
	MROH3P	-1.17716	1.33531e-08
	TLR8-AS1	-1.2301	8.07975e-14
	AL139120.1	-1.19455	0.000269527
	AL139002.1	-1.82799	9.46934e-05
	AL022334.1	-1.01268	3.42639e-11
	AC002069.2	1.05348	0.00263764
	AC011294.1	-1.22031	2.7222e-11
	LINC00513	1.45644	7.56947e-31
	AC093326.1	-1.00859	1.24247e-05
	NRAD1	-2.18591	3.87224e-48
	AC004947.1	1.07954	5.08023e-21
	PAGE2	-2.23193	1.43168e-15
	KAZN-AS1	-1.62876	1.05482e-16
	LINC01287	-1.52615	1.72148e-21
	AL611929.1	-1.61471	0.00142756
	Z82185.1	1.23829	3.1064e-06
	LINC02532	-1.07226	2.9774e-14
	TATDN2P3	1.0289	1.67484e-06
	LINC01634	-1.72429	2.56548e-20
	GXYLT1P6	1.21442	1.23042e-06
	AC093083.1	-1.08919	0.00187873
	AL391883.1	1.0821	1.37075e-06
	BARX1-DT	-1.31016	2.73945e-05
	TBCAP2	-1.08697	8.88155e-05
	Z93022.1	-1.07478	5.19548e-07
	MTCO1P46	-1.29439	2.64766e-09
	AL627311.1	1.21634	0.000428694
	ELFN1-AS1	-1.04878	2.82441e-08
	AC010729.1	-1.01936	2.2453e-06
	TRHDE-AS1	1.55995	1.59211e-24
	SCAT8	-1.72792	6.45379e-31
	ATP13A5-AS1	-1.2615	2.09842e-12
	RPS27AP7	-1.1765	1.02209e-07
	MED15P5	1.5738	8.81751e-08
	DAPK1-IT1	-1.20393	0.000322379
	LINC01554	-1.39449	8.1887e-25
	NF1P8	-1.62723	8.35691e-05
	LINC01812	1.21504	9.49045e-06
	C4orf51	-1.1732	2.80271e-12
	HUNK-AS1	-1.13969	1.74354e-08
	DNAJC19P1	1.22343	1.14812e-07
	SULT1C2P1	-1.18114	1.00608e-08
	AL445489.1	1.23833	0.000118073
	CBX1P3	-1.3086	4.48969e-21
	LINC01351	-1.06566	5.93299e-06
	AL360007.1	-1.26962	2.01016e-05
	AF241725.1	-2.879	0.00630207
	OR11Q1P	1.14225	0.000897094
	AP004289.2	-1.44493	5.80685e-08
	SLC9A3P2	-1.11149	0.00149328
	LINC00707	-1.14527	6.64988e-09
	U3	1.74369	0.000137482
	RNU1-88P	1.09321	0.00459135
	SCARNA7	-2.48391	2.028e-66
	SCARNA10	-2.17995	7.30282e-42
	AC092691.1	1.39085	8.24803e-06
	RN7SL507P	1.21916	0.00233687
	RN7SL672P	-1.27712	4.22341e-06
	RN7SL255P	2.4269	3.49009e-07
	TCAM1P	-1.25491	3.91124e-12
	RN7SL503P	-1.10748	0.00549274
	RPL39P26	-1.00711	0.00212686
	AC092979.1	2.80532	3.4526e-24
	LINC01168	1.25661	2.72278e-07
	OR5G3	-1.34911	4.18838e-06
	AC092910.2	1.92869	0.000386289
	SUMO1P1	-1.32209	1.57795e-10
	LINC01324	-1.13907	0.00424231
	RN7SL170P	-1.22531	9.49689e-07
	HOXB-AS4	-1.08487	1.12264e-07
	RN7SL57P	-1.0504	0.0051005
	LINC02082	1.09835	4.24704e-10
	MAGEA5	-1.36267	1.78563e-05
	AC010729.2	-1.07263	3.22884e-10
	CSAG4	-1.34609	0.00872208
	RPS29P11	-1.04652	5.70912e-09
	CD200R1L-AS1	1.16706	8.47961e-09
	AC026336.1	1.80696	7.65494e-06
	IGKV1-12	-1.00036	5.17153e-11
	GUCY2GP	-1.04991	0.00042205
	RN7SL173P	-1.54285	1.26031e-05
	RN7SL370P	-1.1479	0.00351986
	IGKV1-5	-1.08215	2.7035e-14
	DNAJB6P7	-1.1589	1.94057e-08
	WFDC6	-1.12573	6.15359e-08
	CACNA2D3-AS1	1.29774	8.584e-06
	RN7SL698P	1.02252	0.000287054
	RN7SL125P	-1.18757	0.000554545
	AL109761.1	-1.0217	3.47394e-10
	AC026316.3	1.09129	4.27821e-06
	AC022075.1	-1.02274	6.0365e-19
	ALDH1L1-AS2	1.14456	2.75646e-12
	CASC8	-1.21404	8.58615e-16
	AC010280.1	-1.80816	1.46189e-12
	AC021134.1	1.32844	3.80996e-05
	PCP4L1	-1.52928	9.6811e-30
	ASNSP1	-1.363	1.68542e-05
	LINC02437	-1.13552	1.03631e-06
	AC022784.1	-2.24285	6.47203e-33
	AC025470.1	-1.40796	4.91403e-09
	THUMPD3P1	1.05098	0.00976745
	LINC02115	1.65901	7.15775e-22
	AC111000.2	-1.18957	0.00663008
	AC092349.1	-1.06487	0.00618763
	AC097512.1	-1.15574	0.00510905
	AC010280.2	-1.53797	8.22975e-34
	AC011389.2	1.04422	1.4944e-06
	LINC02224	1.10735	2.53818e-06
	AL359273.2	1.08658	6.75168e-09
	LINC01411	1.04983	3.12383e-09
	AC093523.1	-1.00313	3.06103e-07
	CASC9	-1.14838	5.10245e-05
	LINCR-0003	-1.02956	3.61306e-05
	AC010280.3	-1.26641	1.17771e-06
	AC004704.1	-1.39813	4.42712e-08
	LINC00964	-1.04138	1.40724e-13
	AC119150.1	-1.14651	6.45449e-05
	UGT2B24P	-1.79363	1.6253e-06
	AC122710.1	-1.34269	0.00102849
	AC053513.1	-1.35644	1.14519e-07
	AC105383.1	1.29132	7.79074e-09
	LINC02229	1.05516	0.000212506
	MGC32805	-1.65796	5.46046e-23
	UBE2CP3	1.16651	1.64874e-05
	AC022113.1	1.10089	1.5801e-13
	AC105914.2	1.43517	0.000130084
	AC092335.1	1.3552	1.49603e-05
	LINC02233	-1.37211	3.65815e-06
	AC007126.1	1.2906	2.89272e-06
	AC104407.1	2.27092	4.0304e-17
	KNOP1P5	-1.8513	5.57188e-14
	AC010406.1	1.00599	1.23266e-07
	LINC01511	-1.35838	6.10091e-09
	LINC02492	-1.40996	6.15917e-09
	AC110753.1	-1.14129	0.00041688
	LINC01950	-1.30695	3.51172e-06
	AC104663.1	1.97745	3.37881e-09
	AC107208.1	-1.43185	0.000179733
	RFPL4B	1.01655	2.09842e-12
	AC096736.3	-1.15648	0.000615586
	AC099520.1	1.22284	1.89891e-08
	LINC01385	1.0673	3.48934e-05
	AC073848.1	1.38701	1.45862e-08
	UGT2B27P	-1.11526	0.000926849
	RNU6-998P	1.21597	3.20136e-05
	RNA5-8SP6	1.76601	8.71119e-10
	SCARNA5	-2.91809	1.13889e-58
	RNY4	-1.96195	7.34301e-05
	SCARNA13	-1.249	1.87293e-36
	RNA5SP33	-1.32126	0.000214198
	SCARNA21	-2.30933	2.68652e-48
	RNA5SP101	1.19675	1.20431e-07
	SCARNA3	-1.21885	0.00108503
	SCARNA1	-1.20175	3.8766e-07
	RN7SKP256	2.11329	5.52112e-06
	AC023403.1	-1.35073	8.6593e-09
	AC108515.1	1.27604	2.72469e-06
	AP001574.1	-1.11599	1.75408e-10
	LINC01606	-1.99777	1.49643e-13
	STAU2-AS1	-1.15041	3.95849e-26
	AC111149.2	-3.07608	3.69686e-14
	AC008514.1	-1.20681	5.98148e-19
	AC016868.1	-1.0981	1.01508e-05
	LINC02237	1.51305	7.55067e-15
	AC136424.1	-1.89925	0.000356067
	IGHV7-40	-1.1068	0.00126347
	AC104966.1	-1.32917	5.42324e-14
	KCNIP1-AS1	-1.0986	3.72349e-06
	LINC02845	-2.10001	2.85472e-12
	LINC02844	-1.29453	6.00532e-08
	LINC01030	1.19482	0.000164778
	SIRLNT	-1.33709	1.82801e-06
	AP003472.1	-1.22211	3.25817e-16
	AC007991.2	-1.12209	6.8175e-09
	FER1L6-AS2	-1.33938	8.745e-07
	LINC01608	1.50672	0.00677951
	LINC01419	-1.40038	0.00851136
	AC079296.1	1.32955	1.41719e-15
	AC011632.2	1.22009	0.00083102
	AC016885.2	-1.78087	1.62772e-06
	AC091939.1	1.59674	5.25741e-12
	AC015522.1	1.14046	6.08111e-06
	RPSAP71	-1.15746	0.00175336
	AC007991.4	-1.1368	1.33006e-10
	AC087269.1	-1.01476	2.55873e-05
	GLYATL1P4	-1.50023	4.82876e-23
	AC044839.1	-1.24939	0.00022365
	ETS1-AS1	1.54708	6.11462e-09
	AP001783.1	-1.75222	3.38068e-16
	AP003100.1	-2.23506	2.92981e-14
	INS	1.3401	0.00154703
	RTL1	-1.34692	8.14352e-08
	AC087379.2	-1.0391	0.00014707
	AP002358.2	-2.13541	3.25997e-27
	AP003059.1	1.00632	1.60563e-13
	SLC25A47P1	-1.15481	1.71686e-06
	AP002001.1	-1.87316	5.79131e-09
	LINC00678	1.15862	0.000175749
	AC093496.1	1.1896	7.37541e-09
	AP002001.2	-2.10255	3.15859e-08
	AP004247.2	-1.25166	0.000231738
	GLYATL1B	-1.02002	1.80346e-16
	LINC02726	-1.12345	0.00404068
	DDX18P5	-1.36214	8.76911e-12
	CARD17	-1.07045	5.02601e-14
	AL137224.1	-1.50573	0.000106268
	AP002008.3	-1.13227	6.20689e-05
	LINC02735	-1.21331	4.17057e-05
	RMST	1.0281	2.08831e-09
	CYP2A6	1.2746	6.66744e-10
	MT1JP	1.16433	8.89807e-10
	CACNA1C-AS4	1.52599	1.23061e-05
	AC243972.2	-1.75566	2.94123e-11
	TSPAN9-IT1	1.25636	0.000996241
	MRGPRF-AS1	1.29491	6.74088e-26
	AC019209.3	1.62078	1.92264e-05
	AP002383.3	-1.14554	2.4859e-08
	CCND2P1	-1.58154	1.21472e-07
	SLCO1B3-SLCO1B7	-1.14985	0.00263396
	CLLU1	-1.07731	1.71393e-13
	AC126178.1	-1.10992	9.11242e-14
	AC090531.1	1.49713	0.000544409
	KIRREL3-AS1	-1.52084	2.98227e-08
	MGAM	1.10348	1.03747e-15
	AC073525.1	2.42507	2.2312e-17
	AC025154.2	-1.08272	1.05716e-08
	AC004217.2	-1.37022	0.000146452
	AC068643.1	1.63107	7.22113e-06
	LINC01490	2.07727	1.76362e-05
	MGAM2	-1.62866	1.18879e-26
	GLYCAM1	-1.59848	1.20487e-09
	AC089998.2	-1.45792	3.31747e-05
	LINC02306	1.47363	2.12924e-11
	AC128707.1	1.42498	0.00179496
	CCNG2P1	-1.1571	1.40329e-06
	AC069228.1	-1.41939	1.80313e-05
	AC107023.1	-1.69506	0.000112137
	AC089998.4	-1.09366	1.95249e-06
	LINC02300	-1.01316	0.000205798
	ZNF75BP	1.59178	0.00620324
	AL589182.1	-1.29334	9.42035e-06
	AC130895.1	-1.01088	1.97134e-05
	AC079384.1	1.4113	1.38345e-09
	AC100868.1	-1.57227	0.00118728
	AC027013.1	1.01053	2.56412e-06
	LINC02287	1.27973	3.6165e-07
	CRAT37	1.42931	8.00813e-16
	LINC02303	-1.63132	5.3402e-11
	LINC02833	1.17577	0.00146459
	AL110505.1	-1.27537	1.42445e-05
	AC013457.1	-1.80174	3.94224e-07
	RANBP20P	-1.61422	1.20411e-14
	AC018946.1	1.30309	1.32776e-07
	AC087482.1	1.70514	1.98288e-25
	LINC02169	-3.02112	4.37073e-29
	AC084759.2	-1.29033	0.00114676
	AL845331.1	1.0462	6.88064e-12
	LINC02189	-1.10442	0.000196352
	LINC01070	1.41044	5.2127e-12
	CCDC187	1.13109	5.17352e-10
	AL031598.1	1.64812	1.38571e-08
	AC106785.2	-1.31859	0.00394205
	AL031713.1	1.361	2.15947e-05
	AC104072.1	1.31485	2.6907e-09
	XKR7	2.29658	7.7118e-39
	AC009093.3	1.01338	5.67107e-12
	LINC02188	-1.49025	2.00282e-15
	AC120498.6	1.91631	1.91617e-17
	AC084064.1	1.28492	1.78481e-09
	LY6L	-2.40255	3.47334e-07
	SSTR5-AS1	1.22411	5.06681e-08
	CCDC92B	1.80238	7.66578e-08
	BCAR4	-1.38209	2.78351e-12
	MMP12	-1.05607	2.66989e-12
	SAMD11P1	1.079	0.000207245
	AC091043.1	-1.55233	5.72505e-05
	RN7SL555P	-1.47827	0.00330077
	AP005120.1	1.01328	7.03887e-05
	LINC01925	-1.83055	0.000107735
	LINC01444	-1.18283	2.38423e-06
	PRKCA-AS1	1.41914	0.000147592
	RN7SL664P	-1.12846	3.77079e-05
	AC090358.1	1.15528	0.000112807
	AC015910.1	-1.03256	3.74687e-07
	AC005304.2	1.15356	7.89369e-06
	RNASEH1P1	-1.28705	0.000398529
	RN7SL300P	-1.03323	0.00178566
	LINC00668	-1.1344	3.17414e-05
	GACAT2	1.3654	4.53574e-15
	LINC01927	1.01425	9.92578e-11
	RN7SL493P	-1.58922	0.00398793
	GDF10	1.08899	8.97913e-22
	LINC01443	-1.30136	1.62951e-12
	MAGEA10-MAGEA5	-1.95698	8.2661e-11
	AP005262.1	-1.19912	0.000663632
	AC132825.4	-1.74387	2.30869e-14
	AC090220.1	-1.54903	2.90265e-08
	AC023421.1	1.22446	7.34017e-18
	LINC01532	1.54672	2.12233e-12
	AC105094.1	-1.93044	1.00255e-15
	LCN6	1.53145	2.02838e-36
	AC005381.1	-1.16528	9.51313e-07
	LINC00906	1.14199	9.32618e-08
	LINC01028	1.34904	1.24142e-10
	AC002546.1	1.45054	3.81462e-15
	AC024592.2	-1.16946	1.11045e-12
	AC016885.3	-1.09654	7.92571e-05
	SLC6A14	-1.57872	5.62338e-20
	AC073342.2	-1.13818	1.42384e-06
	CLEC4GP1	1.08638	4.74948e-09
	MTDHP3	1.17391	1.02052e-05
	AC245884.9	-1.2642	4.59765e-12
	SCGB1B2P	-1.72133	7.83974e-41
	CSAG2	-1.57877	2.09538e-08
	CSAG3	-1.58862	1.76698e-09
	ERVV-2	-1.52618	1.65931e-09
	BNIP3P18	-1.03594	0.0012378
	ERVV-1	-1.24044	1.57227e-10
	CT45A10	-2.42727	3.99604e-06
	AC006262.3	-1.88901	1.93755e-06
	AC007375.3	1.15149	0.000506827
	RMRP	1.64467	1.28149e-08
	AL133467.4	-1.03344	0.00181892
	OR7E108P	-1.08998	5.98105e-07
	IGHV3-30	-1.00789	5.06588e-12
	RNVU1-31	-2.40572	2.06357e-28
	LINC00221	-1.07563	0.000368726
	GMCL1P2	-2.01358	4.45888e-12
	AC007423.1	1.15116	5.36312e-08
	AL591034.1	2.59817	3.73431e-13
	NANOGP3	2.06778	2.00147e-07
	MMP28	1.02758	5.13851e-48
	AL445209.1	-1.35559	0.000915015
	AC008592.4	-1.50975	4.86561e-25
	AC006058.3	-1.07035	1.76362e-05
	LINC01749	1.07656	0.0002079
	AFAP1-AS1	-1.38424	7.44626e-16
	AC073107.1	1.09995	0.000127128
	AC103702.2	-1.06199	1.56211e-10
	FAM25BP	-1.32951	0.000268016
	ZBTB8B	-1.01506	1.73847e-12
	RNVU1-29	-1.09615	1.88339e-06
	AC008957.2	-1.55326	1.05604e-09
	H4C13	-1.61555	1.35496e-05
	CCL16	1.09748	1.66568e-24
	AC018445.1	-1.10437	1.86073e-06
	AL161431.1	-1.82188	4.44385e-07
	AL391095.2	-1.63086	5.28369e-09
	CCL18	-1.11308	3.84237e-16
	LINC01742	-1.2264	7.6722e-08
	PRSS2	1.31625	4.0561e-14
	RN7SL197P	-2.23432	0.000221471
	AC009542.2	-1.14016	0.00421223
	AC006017.2	-1.95375	1.4325e-08
	FLJ36000	-1.46402	0.00362413
	CCL14	1.17207	1.46311e-27
	H2BC3	-1.27775	1.11355e-11
	IGHV4-4	-1.1411	3.23393e-11
	AC148477.4	1.26259	0.000886532
	AC005696.4	1.05102	2.20502e-11
	GPIHBP1	1.37133	8.17011e-52
	PGM5P3-AS1	1.32158	2.32879e-21
	AP003900.1	-1.22714	0.00682602
	FP325317.1	1.88127	5.02946e-25
	AC126175.2	-1.22443	4.23315e-07
	AC006262.4	-1.63923	1.6648e-07
	RNVU1-28	-1.94377	9.49508e-05
	AL031658.2	1.03774	0.00249205
	RN7SL660P	-1.42084	0.00573334
	RN7SL3	-3.08754	1.33171e-76
	AC087045.3	-1.04949	9.82963e-05
	AC091931.1	1.8654	5.89285e-06
	AC112255.1	-1.29114	6.11933e-20
	GPR1-AS	-1.00746	3.91559e-05
	AC024595.1	-1.01115	0.00393398
	AC112243.1	-1.14626	0.00164753
	AL359396.2	1.33284	1.85635e-06
	MAPT-IT1	1.02542	3.65875e-10
	AC011270.2	-1.07689	1.59371e-07
	AL390318.1	-2.01412	5.01155e-06
	C8orf87	-1.7242	8.8434e-11
	LINC01667	-1.82155	1.29198e-07
	AC084026.3	1.12272	0.000180588
	AL161658.1	1.2698	5.94397e-08
	AC068299.2	-1.11388	1.39983e-05
	AL021877.2	1.1945	2.61882e-06
	AP000962.2	-1.08243	5.20574e-06
	AC004836.1	2.00311	4.1544e-44
	LINC00836	-1.19925	0.000881541
	FOXCUT	-1.08228	5.21574e-06
	AL157778.1	-1.73044	1.172e-07
	LINC01230	1.06787	2.66315e-12
DLBC	KLHL13	-1.4613	0.00268061
	ABCB5	-2.02958	0.00549999
	SCIN	-1.24488	0.00892311
	PRSS21	-3.84233	4.48855e-11
	DNAH9	-1.62612	0.00318488
	CD79B	1.03908	0.00515238
	SCN4A	1.46233	0.000361142
	CD9	1.09721	0.00289495
	DPEP1	1.36251	0.00918281
	SLC11A1	-1.66222	0.00030477
	USH2A	-1.57626	0.00403476
	BARX2	-1.34793	0.00204674
	FOXC1	-1.4136	0.000708999
	CAMK2B	-1.87116	0.00635822
	COL11A1	1.96168	0.00620785
	CTNNA2	-2.79219	0.000207642
	PHKA1	-1.52174	0.000990442
	PDZD4	-1.35233	0.000850962
	HES2	1.79099	0.00203513
	SPEG	-1.02843	0.0015587
	TBX21	-1.21665	0.000403789
	ACTN2	-1.98269	0.00201324
	MAP2	-1.35546	0.00406234
	HOXA9	-1.73766	0.000718433
	CDH17	-1.89236	0.00120024
	DDX43	1.64188	0.000505079
	PTPRH	-1.05332	0.00730851
	EPHA6	-3.06311	0.00264829
	CXCL2	-1.22755	0.00339774
	FER1L4	1.2629	0.00652317
	DOCK3	-1.24458	0.000749078
	SIGLEC1	-1.65274	0.000802166
	CHGB	-1.91048	0.000530692
	CD209	-1.70844	0.000209538
	NRCAM	-1.2214	0.00651646
	TF	-1.37955	0.00363493
	JPH4	-1.48673	0.00169122
	SORBS1	-1.11582	0.00231238
	SMIM24	1.4746	0.0034603
	MISP	-2.25352	0.000595686
	SLC7A4	-1.48475	0.000514515
	UPK3A	-1.47058	0.00178174
	PLTP	-1.27054	5.0977e-05
	VSX1	-2.26463	0.00544812
	BMP7	2.76534	5.07041e-05
	NOL4	1.95767	0.00331433
	SYTL4	1.25055	0.00578368
	ACOD1	-4.27085	2.90615e-08
	CCL17	2.44296	0.00127797
	MEFV	-1.61027	0.000367532
	CRYM	-3.37788	1.48824e-06
	PRSS33	-2.16607	0.00384171
	TOX3	-2.21579	0.00445144
	ACSBG1	-1.13163	0.00683082
	SCG3	-1.40562	0.00360855
	LILRA1	-1.38026	0.000372544
	CEACAM4	-1.42938	0.00140645
	HAS1	1.44217	0.00779663
	THEG	-2.60212	0.00123279
	ITGB8	-1.10032	0.00911349
	MET	-1.70464	0.000564945
	ASPN	2.27039	0.000290861
	KCNT1	-1.20796	0.00517059
	CCL7	-2.76736	1.60224e-05
	CCL8	-2.20347	2.20701e-05
	PPY	-1.30551	0.0021191
	GABRA4	-2.66114	0.000163697
	NMU	-1.8061	1.54899e-05
	FOLR3	-1.50868	0.003405
	ELMOD1	-1.27025	0.00888239
	RERGL	-2.2179	0.00030685
	IFNG	-1.67451	0.000110292
	ULBP1	-1.12685	0.00179409
	GPR63	-1.54126	0.000100612
	PRDM13	-3.19156	4.86611e-05
	GPLD1	1.02315	0.00428014
	ARFGEF3	-1.27151	0.000533039
	CCN6	-1.23003	0.000273521
	SLC4A9	2.04245	0.00049083
	IL12B	3.01836	1.7214e-05
	SERPINI2	-2.45043	8.23896e-05
	ARHGEF26	-1.61418	0.00238541
	OTOF	-1.94572	0.00028976
	PCSK4	1.08763	0.00434383
	TACR1	-1.34629	0.00279425
	EFHD1	-1.08625	0.00133755
	HAO2	-1.91433	0.000258204
	GBP1	-1.07657	0.00464206
	TNNT2	3.20398	1.26791e-08
	CASC1	-1.42415	0.00112627
	ELOVL4	-1.24623	4.76897e-05
	CCND2	-1.22169	0.00647686
	GDA	-1.77573	0.00171542
	ELOVL3	-1.58373	0.000628649
	IFIT3	-1.23838	0.00075222
	CD274	-1.33665	0.00401886
	GRIA2	-2.99455	0.00285219
	ABCC11	-1.00877	0.000821637
	GJA3	-2.40541	0.000469039
	OBP2A	2.31651	0.00365595
	CD244	-1.03143	0.00163853
	DNAI1	-1.81156	0.00734298
	CNTFR	-2.26433	0.00160585
	NECAB1	-1.16851	0.00218014
	HOXC13	-2.57406	0.00470257
	KCNJ2	-1.71041	6.55152e-05
	INHA	-2.03108	0.00138727
	PI3	-2.49342	8.44517e-05
	SLPI	-2.10435	0.000702855
	XG	1.85987	0.000225284
	SLC17A3	-2.36519	0.00656378
	TCP11	-1.68134	0.00130393
	MT2A	-1.40406	0.000963681
	KIR2DL1	-2.45288	1.84382e-05
	IL1B	-1.64484	0.000337706
	IL37	-1.45429	0.00297659
	PCSK2	-2.63873	0.00431479
	FFAR2	-2.63595	2.36971e-06
	AIF1L	-1.09976	0.00091302
	CTAG2	-3.38572	0.000739672
	GNG13	-2.00901	0.00689341
	LIF	-1.29208	0.00437348
	APOBEC3A	-1.88439	0.00155902
	KRT17	-2.57089	1.47295e-05
	CALML4	1.01947	0.00489909
	ATP1B2	-1.91812	1.29892e-05
	CDO1	-1.20765	0.00492066
	CALY	-1.37917	0.00234141
	SLC7A10	-2.84989	5.06758e-05
	HSD17B3	-1.50287	0.0031439
	LILRB2	-1.04659	0.00632266
	IDO1	-1.54658	0.00113283
	TNS4	-1.12716	0.00209025
	JCHAIN	1.41368	0.00511507
	SNAP25	-1.56806	0.000823614
	VSTM2L	-1.72161	6.24201e-05
	MTUS2	-2.31472	6.29065e-05
	LARGE1	1.53696	7.712e-07
	REG4	-2.03812	0.00519518
	CHIA	2.4363	0.00418405
	SAA2	-1.67663	0.00795279
	CRB1	-1.5553	0.00252648
	CABLES1	1.60579	0.000326971
	KLRD1	-1.07065	0.00716867
	KLRC1	-1.5062	0.00265269
	LRP4	-1.20223	0.00723237
	HRK	1.67703	0.00280775
	ADGRB3	-1.48154	0.00420145
	PRPH	-1.43307	0.00506584
	EMX1	-2.97111	1.78133e-05
	KCNK1	-1.45809	0.0076636
	CAPN9	-1.7483	0.00523502
	RGS8	1.95373	0.00832555
	IL1RN	-1.89529	8.89551e-05
	MMP7	2.21506	0.00410782
	MMP20	3.15743	0.00266543
	TRIM29	-2.13001	0.000370942
	CASP5	-1.95132	0.000206839
	PAQR5	1.06634	0.00584165
	IFI44L	-1.27876	0.00702984
	DUSP5	-1.02992	0.00134648
	CCDC54	3.28575	0.000115296
	CILP	2.06427	0.000713856
	HCN4	-1.44725	0.00918128
	PCDH10	-2.7869	0.000183103
	MMRN1	-1.40978	0.00444136
	PLCZ1	-3.45451	0.00622677
	ASCL1	-1.87152	0.00233086
	SSTR1	-1.9543	0.00795392
	CYP1A1	1.94119	0.00653397
	RNF157	-1.1417	0.000808892
	CBLN2	2.46077	0.00183956
	CIB3	1.54633	0.00876755
	SLC6A3	-1.6534	0.000512484
	MOB3C	1.2632	0.00217997
	XCL1	-1.37609	0.00231614
	XCL2	-1.35599	0.00254502
	S100A8	-2.07475	0.000347791
	CNGA3	-3.18132	0.000207227
	ZNF385B	2.31446	0.000588066
	ABCA12	-1.45668	0.00473454
	ADGRG7	-2.92225	0.0062156
	TAGLN3	-2.04816	0.000511648
	LIX1	1.56854	0.00218895
	KCNMB1	-1.01737	0.00713751
	CYP39A1	1.61685	0.00333561
	FAXC	-1.57816	0.00209905
	VWDE	-1.46982	0.00677962
	LINC00525	2.84311	0.00147923
	SYTL5	-3.17499	0.00269259
	MAGEA4	-8.57687	2.2568e-06
	SYBU	1.88082	0.00147275
	CACNA1B	-2.48672	7.4263e-05
	SLC5A12	-4.84734	2.91844e-06
	CDH22	-1.58985	0.0067277
	HMGA2	-2.74735	2.33258e-05
	MMP3	-2.83987	0.00543769
	CD226	-1.15224	0.00434947
	GPR158	-2.76627	9.18162e-05
	THRB	1.68694	2.52671e-05
	MAT1A	-1.58432	0.00374523
	DIP2C	1.45983	0.000226925
	KCTD14	-1.26676	0.00306853
	MSGN1	-2.51337	0.00485042
	ANO4	-1.77235	0.000597493
	SLC35F4	-2.54645	0.00120366
	GLT1D1	1.66816	0.00508562
	TLCD4	-2.07136	4.29132e-05
	JAKMIP1	-1.05296	0.00216963
	ZIC1	2.22634	0.0092104
	SYCP2L	-1.47024	0.0028191
	SLC25A27	1.37775	0.00258027
	ADGRF1	-2.80017	0.000218173
	ADGRF4	-2.27864	0.00294557
	FRMD1	-2.25146	0.00314238
	PLEKHG4B	-1.78091	6.20478e-05
	C16orf74	1.93011	0.000888734
	GBP5	-1.2782	0.00269118
	C10orf90	-2.24621	0.000796606
	NCAM2	1.76969	0.00178419
	FMN2	-2.76528	0.00119183
	ART3	-1.6943	0.000279961
	SLC28A1	-1.5525	0.0026351
	TIMP4	-1.83296	0.000353389
	CACNA2D3	-1.35941	0.00674259
	MX1	-1.51259	2.4891e-05
	KCNB1	-1.26936	0.00761191
	NPM2	-1.2736	0.00145662
	HOXB13	-2.15578	0.00888073
	UROC1	-2.05844	0.00304336
	FAM131B	-1.00065	0.00360419
	FTCD	-1.5495	0.000385699
	FBXL13	1.10268	0.00271835
	SCGB3A1	-2.11029	0.00224356
	DMKN	-1.53496	0.00870967
	SHANK1	-1.28395	0.00407123
	DRAXIN	-1.24114	0.00289391
	SNX7	1.27253	0.000178379
	ACTG2	-2.35144	0.000298899
	IVL	-2.7278	0.00218939
	PGLYRP4	-1.86088	0.00321044
	S100A12	-1.35633	0.00710835
	C1orf189	-1.37857	0.00398342
	ALPP	-2.07553	0.0098176
	PROK2	-1.20314	0.00913214
	CCDC191	1.14911	0.000536199
	SYNPR	-2.90881	0.00940935
	CXCL5	-1.81135	0.00396911
	CXCL1	-2.04351	0.000232274
	TGM4	-1.7683	0.00194993
	FABP7	-2.31116	0.00700707
	ANKRD55	-1.32524	0.00246477
	SLC29A4	1.37381	0.00126452
	FNDC1	1.64094	4.7059e-05
	WNK2	2.04014	0.000313751
	AMER2	-2.82103	0.00044523
	VSTM4	1.0512	0.00451464
	SOHLH1	-3.1426	0.00371624
	GFI1B	-2.36931	0.000889571
	CACNB2	-1.03332	0.00212804
	IL25	-3.11127	0.00199807
	GLB1L3	-1.22491	0.00646193
	SVOP	-2.47249	0.000631249
	AMN	1.48819	0.000722865
	LMO1	-3.19801	0.000131182
	WDR72	-2.10308	0.00928057
	TMEM130	-1.53128	0.00651068
	IQCD	1.52576	4.21793e-05
	TVP23A	1.12234	0.00332451
	SCNN1G	2.2906	0.00469912
	GLYATL1	1.64011	0.00459285
	OR51E2	1.49881	0.00326798
	KIR3DL1	-2.29663	0.000157173
	PPP1R14A	-2.9566	2.21284e-09
	BATF2	-1.02643	0.00239114
	SCNN1B	2.0656	0.000271985
	ADAM29	1.98809	0.000132201
	LRP1B	3.48108	0.000534796
	CXXC4	-1.34632	0.00846229
	CXCL10	-1.08527	0.00964315
	STK32A	-1.41506	0.00688245
	RNASE2	-1.52207	0.00197228
	VPREB1	2.39203	0.000830623
	AHSP	-2.00239	0.00735942
	C7orf33	-4.4594	0.002018
	LGALS9B	-1.29517	0.00542102
	FRMPD2	-1.99335	0.00872459
	DCLK2	-1.50554	0.000143556
	SIX2	1.46622	0.00604381
	LILRP2	-1.28425	0.007119
	CEACAM3	-1.15985	0.00632841
	PLAC1	-1.75988	0.00506503
	NRTN	2.01016	0.000200488
	KRT15	-2.22057	0.000751028
	KRT27	-2.77643	0.000826223
	MAP6	-1.88559	1.20077e-06
	GPR82	2.34319	1.0819e-05
	WDR87	-1.52565	0.00412545
	GAP43	-2.13061	0.000167148
	LRRC15	1.5623	0.00218301
	CALB2	-2.49605	9.85562e-05
	FRMD3	-1.30359	0.00102166
	TPSAB1	1.79073	0.000696204
	PRSS30P	-1.70135	6.00184e-05
	FNDC9	-1.05815	0.00578035
	RXFP4	1.82616	0.00682369
	DMRT2	-3.25044	1.50272e-08
	INSM1	-1.36571	0.00175684
	DAB1	-1.63018	0.0016106
	SAA1	-2.76244	3.42963e-05
	SLCO4C1	-2.33068	4.64107e-05
	CBY2	-4.78559	1.79222e-05
	ADGRE1	-1.49543	0.00179626
	NPPA	-2.41881	5.25786e-05
	GAL3ST3	-3.0783	0.000116095
	PHYHD1	1.08263	0.00979206
	GPR152	1.37752	0.00887817
	FOSL1	-1.13808	0.000106885
	SUGCT	1.84281	0.00277699
	EIF4E1B	-1.69011	0.00735852
	LINC02694	-1.38571	0.00217229
	SFN	-1.90291	0.000292597
	LRRTM4	-2.76613	0.00355528
	ZDHHC22	-2.82414	0.00409838
	UMODL1	1.72242	0.00134789
	CD163	-1.47601	0.00220227
	PCDHB9	1.14837	0.00670335
	CSRNP3	-1.65978	0.0018412
	LMO7DN	2.01217	0.00764205
	C14orf39	2.59514	0.00048059
	FAM133A	-2.25107	0.00380847
	IL6-AS1	3.04484	7.89602e-06
	NLRP11	2.63182	0.000173911
	FAR2P1	-4.39035	8.31981e-08
	HERC2P3	-1.80478	4.30961e-05
	PRF1	-1.01499	0.00150346
	ANKRD30B	-2.46229	0.00251869
	MAPK15	-1.28937	0.00159182
	C4orf50	-1.24967	0.00063668
	C6orf223	1.66155	0.00203098
	CACNB4	1.33149	0.00667834
	IFNL1	-1.88782	0.000706058
	RNASE10	-1.29865	0.00532066
	SPNS3	-1.00218	0.00976246
	LINC00334	-2.12297	0.000225364
	PPP1R27	-1.34367	0.00778415
	PLCXD3	-1.88737	0.00271564
	RGS7	-2.95912	0.000559591
	FREM3	-1.94907	0.00744152
	GABRR3	-2.5258	0.000232657
	C2CD4C	-1.42204	0.000463299
	CTNNA3	-1.52406	0.00327508
	GRIN2A	-1.58679	0.00674247
	CCR3	-1.37591	0.00616741
	OPCML	-2.15262	0.000268845
	CCR4	1.52527	0.00179618
	FAM3B	2.291	0.000148539
	KCND2	-1.76706	0.0043653
	POU3F2	-1.42192	0.00763575
	FAM167A-AS1	2.52019	0.000955768
	UNC93B5	1.60439	0.00528586
	TRARG1	-1.6902	0.00320971
	TCEAL2	-2.23908	0.000118624
	MUC6	-1.12512	0.00691922
	RBM11	-1.42109	0.00777901
	CD24P4	2.40469	0.000611902
	C12orf56	-2.7793	6.87082e-05
	KRT6B	-2.79826	0.00739028
	PDIA2	2.41686	0.00101819
	PMEL	1.19726	0.00210409
	NAT8L	-1.2514	0.00999264
	ATP4B	2.8256	0.00202994
	CD300E	-2.40268	1.7271e-06
	GLDN	-1.9522	0.00073898
	LINC01551	2.83982	0.000327862
	CYP4A11	-2.55352	0.00509763
	SLIT1	1.48611	6.94234e-05
	VSTM2B	-2.2792	0.000416203
	FAM9C	4.02058	1.05779e-05
	KCNJ11	1.32313	0.00280402
	ERC2	-1.89747	2.56838e-05
	KBTBD12	3.25178	0.000409866
	LDLRAD2	-1.24896	0.000787817
	OR7D2	1.74342	0.00362516
	NKAIN2	-2.9723	9.50797e-05
	CALHM6	-1.06808	0.00352653
	LIPI	-2.39226	0.00653827
	KIR2DL4	-1.30659	0.0027915
	VSTM1	-2.09914	0.00323656
	DPY19L2P1	-2.24861	0.00604787
	TOGARAM2	-1.51192	3.84587e-07
	PLEKHG4	-1.23491	0.000133173
	ELAVL3	1.81151	0.00125442
	ASMT	-2.51479	9.76797e-06
	ADH1B	-1.64689	0.00767872
	S100A2	-1.12076	0.00453335
	TPSB2	1.59453	0.0047991
	IL27	-1.35183	0.00671769
	GYPE	1.35512	0.00308963
	SSPOP	-1.14831	0.00308952
	MFAP5	1.74434	0.000636986
	MYH6	-2.34897	0.00112052
	DPP4	-1.10579	0.00174021
	FCGR1B	-1.38663	0.00523056
	MT1F	-1.37305	0.000435205
	FAM3D	-1.42762	0.00476239
	MTCO3P12	1.76362	0.000856104
	OXCT2	-1.16151	0.00898472
	COLGALT2	-1.51513	4.42367e-05
	SOWAHA	-1.3592	0.00966426
	MIR146B	-1.81727	0.00578539
	SAMD5	1.15793	0.00287805
	FCGR3A	-1.28593	0.00390291
	NEU4	-1.46968	0.00041305
	PSORS1C2	-6.03402	2.51327e-10
	TRIM10	-1.93072	0.000702704
	LINC01121	1.73822	0.00673461
	CTXN3	-3.8246	0.00130244
	SLCO6A1	-4.75205	1.33174e-05
	MT1DP	-1.62843	0.000157824
	KRT6A	-2.95288	0.00196552
	AP001042.1	-1.34385	0.00794392
	ARRDC5	-1.03764	0.00888628
	ZDHHC11B	-1.59596	0.00286589
	SNORD60	-1.00791	0.00998559
	MT-TF	-2.29974	1.22941e-05
	MT-TS2	-1.90431	0.00236982
	IGLV8-61	-1.60516	0.00847019
	IGLJ2	2.10198	0.000395681
	IGLC7	2.85237	0.000122736
	IGHV4-28	1.61744	0.00520471
	IGHV4-39	1.81531	0.00567335
	IGHV5-51	2.3735	0.000254756
	IGHV3-66	2.28467	0.000352744
	EWSAT1	-1.50935	0.00764115
	MAGEB1	-9.67615	1.68325e-12
	COLCA2	-1.8339	0.000712915
	KANSL1-AS1	-1.40462	0.000252149
	GTF2IRD2P1	1.38826	0.000272739
	MS4A4E	-1.50233	0.000964866
	LINC01588	1.14575	0.00258871
	ACSM4	-1.4217	0.0032398
	ZNF663P	-3.28797	0.000409914
	LINC00598	1.50512	0.00212401
	AP005901.1	2.91093	0.000279117
	LY86-AS1	1.22519	0.00911415
	LINC01644	-2.55405	0.00208592
	TUBBP9	-2.74316	0.000596469
	SLC12A8	2.12194	2.46469e-06
	KIR2DS4	-2.17433	0.000116459
	RAB6C	1.39485	0.00969266
	IGLC6	3.55926	1.3915e-07
	LINC02068	-1.75534	0.00945948
	AL513523.1	-1.08554	0.00424473
	TSSC2	1.04869	0.00776443
	AC073365.1	-6.2522	0.000240272
	AC091729.1	3.63687	8.34526e-08
	LINC01857	-1.13482	0.00563714
	DTNB-AS1	-1.70296	0.00175505
	AC131097.2	-1.67901	0.000105223
	CAMTA1-AS1	2.73883	0.0026167
	SFTA1P	-1.23493	0.00552649
	GBP1P1	-1.15524	0.00128325
	AC064875.1	-1.69829	0.00492622
	AL031846.1	-1.10283	0.00219286
	MTND1P23	-1.2561	0.00126098
	LGALS17A	-1.84025	0.000180804
	AC091729.2	1.51532	0.00417501
	AL122058.1	2.78667	0.000587917
	LINC01918	-2.85312	0.00092752
	LINC01535	1.74541	0.000235085
	ARHGAP29-AS1	-2.19462	0.00144001
	MUC12-AS1	-1.24273	0.00288081
	LINC00629	-1.65129	0.00596179
	TRGC2	-1.1403	0.00221209
	RPS8P4	1.55959	0.00263413
	AL160163.1	1.8933	0.00214741
	RPS3AP53	-2.51076	0.000910287
	ADGRF5P1	-1.91742	0.00794043
	AL391056.1	-1.46385	0.00124798
	LINC01402	-2.69253	0.00315002
	ITPKB-IT1	1.6463	0.000268193
	AC006460.1	-1.31588	0.00313781
	SNRPGP9	-1.12775	0.00108822
	AC079793.1	-1.13844	0.00641987
	AL034347.1	1.50172	0.00585488
	AL445189.2	-1.41396	0.00200732
	AC090954.1	-2.96708	0.000657347
	AC009229.2	-2.28741	0.00763984
	AL358473.1	-1.68741	0.00381665
	SNHG31	1.26271	0.00336471
	LINC00858	-4.53735	0.00048088
	AL137186.1	-1.29428	0.00131166
	ANKRD36BP2	1.9013	8.18217e-05
	LINC02800	2.12467	0.00182379
	LINC01048	2.30985	0.0020816
	COL6A4P1	-1.64319	0.0081092
	TEX48	-1.38505	0.00370445
	AC074011.1	-2.62246	1.74028e-05
	LINC01507	-2.89025	0.00146978
	AC096637.2	1.63432	0.00515472
	AC093702.1	2.17157	0.0024733
	AL157884.2	-2.16447	0.00651326
	KLF2P1	-3.12052	0.00240054
	FAR2P4	-3.13552	0.00297431
	AC099568.1	-1.853	0.001113
	LINC01307	-6.13801	1.71497e-06
	AL109615.2	1.54136	0.00727892
	MRPL35P2	1.71586	0.00949328
	LINC01697	2.70471	0.00133809
	LINC00384	-1.49481	0.00482685
	MTND4P24	-3.14573	6.74154e-05
	AL355994.2	2.68088	0.00632113
	AL590609.2	1.52084	0.00663504
	LINC01412	-1.1894	0.00984647
	LINC02576	1.96855	0.000216738
	AC002511.1	-2.0327	0.00827115
	AC097717.1	1.17249	0.000591315
	AL732292.1	-2.73669	0.0029155
	LINC00472	-1.56445	0.00178273
	IGHV3OR16-10	2.78102	0.00524657
	LINC01251	1.53019	0.00465391
	AC138951.1	1.43793	0.00960795
	CHIAP3	-2.74265	0.00989759
	AL358473.2	-2.08785	0.00495876
	ANAPC1P4	-1.32629	0.00298666
	MAP3K5-AS1	-1.48888	0.000216729
	LINC01250	2.01544	0.00152241
	AP000253.1	1.27961	0.00758838
	LNCTAM34A	-1.31595	0.00354876
	LINC01800	1.4715	0.00545911
	LINC01239	3.18068	0.000921486
	COX20P2	-3.03317	0.00134559
	FNDC1-IT1	2.12313	0.00361635
	THRA1/BTR	-1.88793	0.00482208
	LINC01967	-2.44625	0.00974629
	LINC00837	-2.15623	0.00659643
	AC091132.2	1.76916	0.00991875
	TRHDE-AS1	-2.37817	0.000502609
	SIX3-AS1	-2.61272	0.00710463
	IFITM3P1	-1.25801	0.00986919
	LINC01010	2.00767	0.000685902
	AC019118.2	2.89593	0.00164999
	AC024560.1	1.44969	0.00864353
	HNRNPA1P70	1.26832	0.00290756
	GGT8P	-2.67132	0.00557524
	ANKRD44-IT1	-1.27632	0.000761159
	BMS1P10	1.86355	0.0011023
	BHMG1	-1.54413	0.00818317
	PKN2-AS1	-1.07905	0.00761234
	SHISA9	-1.77877	0.0081772
	SPATA3-AS1	-2.64046	0.000533268
	CASC4P1	2.07254	0.000914396
	MYO5BP2	-2.29601	0.00687802
	AC108058.1	-1.58349	0.0012189
	AC008040.1	1.31783	0.00951306
	AC125618.1	1.83019	0.00874352
	AC063944.1	1.90468	0.00296059
	IGKV3-20	2.02556	0.00195215
	LILRA2	-1.29435	0.00208048
	L1TD1	-2.23599	0.00155114
	PNMA2	1.37602	0.00125262
	LINC00877	1.48265	0.00697059
	IGKV1D-16	4.02296	6.06915e-07
	KIR3DL3	-2.87283	0.00634445
	ARHGDIG	2.89768	6.7312e-05
	NECTIN3-AS1	-2.93293	0.0001218
	PCDHGC4	1.65078	0.00323134
	SERPINB10	-2.95487	0.000263375
	DECR2	-1.12664	0.00764003
	SOX2-OT	-1.4788	0.00874913
	IGHJ3	2.03776	0.00329109
	LINC00870	2.82897	0.00207121
	AC007686.1	-1.42127	0.00934272
	RN7SL8P	-2.46215	0.00593857
	IGKV1-5	1.54874	0.00877342
	RN7SL337P	2.26735	0.00197108
	KIR2DL3	-1.66002	0.00129584
	RTL9	-2.20132	0.00556464
	FCGR2C	-1.4043	0.000425161
	AP005717.1	1.61414	0.00948307
	MTND4P12	-1.54396	0.00874261
	AC120036.1	-2.8481	0.00233919
	AC106882.1	1.6466	0.00328335
	AC021127.1	-1.60992	0.00462046
	AC097375.1	-2.35111	0.000989037
	AL033397.2	-1.73971	0.00966089
	LINC01258	-2.49393	0.00265534
	AC008691.1	1.75804	0.00709442
	AC093890.1	1.61225	0.000399135
	AC105914.1	2.42221	0.00780898
	AC008840.1	-1.23777	0.00999672
	PSMC1P5	1.98379	0.00333658
	AC079160.1	-3.3619	0.00146585
	RPL38P4	-2.43761	0.00276545
	AC097652.1	-2.04739	0.00231332
	LINC00491	-4.33432	0.00211968
	AC025419.1	-2.37217	0.00158455
	AC025465.4	2.65659	0.00334435
	AC107223.1	1.65742	0.00330814
	AC005920.3	-2.68022	0.00668916
	GUSBP3	2.55591	0.0040788
	MIR124-1HG	-1.77248	0.00745617
	IGLVI-70	-1.75035	0.00435965
	C8orf88	-1.31676	0.00765546
	IGHV7-34-1	3.74134	0.000293629
	COPDA1	1.98452	0.00623227
	LINC01942	2.00128	0.00648645
	IGKV1-13	2.03972	0.00429344
	RNF5P1	-1.13799	0.0064708
	LINC01484	2.10875	0.00489701
	IGHEP1	2.49131	0.0065528
	C8orf37-AS1	1.1196	0.00711997
	AC007991.2	-2.51	0.000118761
	PCDHGB2	2.06324	5.00485e-05
	AC105118.1	-2.31776	0.00101122
	AC007991.4	-1.59322	0.00773288
	MAFA-AS1	-1.99455	0.00296162
	GLYATL1P4	1.66348	0.00672754
	SIGLEC12	-1.29911	0.00829839
	AC027031.2	-1.73685	0.000102385
	AC023232.1	2.56286	4.90952e-05
	XIAPP2	-1.82259	0.00691721
	LINC02704	-2.68693	0.00485847
	LINC02757	1.8091	0.000279475
	HCAR3	-1.83797	0.00248563
	AP002008.3	1.27145	0.00631625
	AC090589.2	-2.53085	0.000593416
	AP000708.1	-1.9435	0.00111251
	AP000439.2	-2.24445	0.00873391
	AC007637.1	1.57371	0.00155772
	RPL7AP3	-1.557	0.00634379
	MRGPRF-AS1	-2.0024	0.00123725
	MTRNR2L1	2.98534	0.00197693
	PDE2A-AS2	-1.24862	0.00081045
	AC135782.1	-2.67737	0.000100931
	AC027288.1	-2.06146	0.00694424
	AC079313.1	1.46575	0.000573073
	AC068896.1	1.64375	0.000304708
	LINC01629	-2.80717	0.00999527
	AC026495.1	-1.98093	0.00322142
	TMEM179	-2.19178	0.0052533
	AL121820.2	2.03589	0.000985444
	CPEB1-AS1	-1.87326	0.00668864
	AC135782.2	1.40403	0.00674572
	LINC02846	-1.00621	0.00584989
	CCDC187	1.73505	0.00467917
	FRRS1L	-2.42354	0.0028175
	SERTM2	-2.43038	0.00018655
	AC106820.5	1.0916	0.00724618
	CDC37P2	1.43532	0.00814401
	EPPK1	-1.27698	0.00558659
	AC064805.1	-1.4691	0.000497546
	LINC01976	-2.33628	0.00475466
	AC015720.2	-1.48889	0.00924134
	PCDHGA9	1.22756	0.00673007
	LINC00514	-1.49121	0.00321947
	PCDHGB3	1.56433	0.00505882
	MAPK8IP1P1	-3.67213	0.00598341
	MTCO1P40	-2.13772	5.59012e-07
	AC003965.1	1.30764	0.000955777
	MAPK8IP1P2	-4.04252	0.000828277
	AF186192.3	1.84681	0.00425577
	AP005230.1	-1.88229	0.00420741
	AC015845.2	-1.76173	0.00255032
	AC004585.1	-1.14444	0.00812
	AC005224.2	-2.57924	3.31691e-06
	LINC01887	2.61614	0.00399913
	AC005993.1	-4.38502	0.00444635
	PTGES3L	-1.04202	0.00913149
	AC011472.2	2.03601	0.000442278
	AC011444.2	-4.22817	2.89785e-06
	BOLA3P2	2.28133	0.0085708
	AC015911.6	-1.70109	0.000854475
	KCNJ2-AS1	-1.28123	5.13879e-05
	AC005498.2	1.3359	0.00693397
	DNAH17-AS1	-1.87873	0.00850052
	AC104365.2	-2.35156	0.00152154
	AC016168.1	1.83341	0.00767193
	AP005264.5	1.80189	0.00621943
	AC093063.1	-2.04503	0.00218669
	AC020908.1	1.88117	0.00980834
	AP003680.1	-1.82395	0.00803485
	CT45A1	-6.14872	0.000164727
	BNIP3P18	2.39415	0.00862214
	CT45A3	-3.63713	0.00766693
	TMSB15B	1.0611	0.00312541
	CYP4F23P	-2.37714	0.00670149
	CT45A10	-6.57595	2.08529e-05
	ARHGAP19-SLIT1	1.66572	0.00196297
	MTCO3P22	-1.60804	0.00895069
	RASL10B	-1.33804	0.00879741
	AC136475.9	-1.31991	0.00894633
	NAMA	1.75848	0.0084919
	AP000526.1	-2.06951	0.00930503
	IGHV3OR16-13	2.0702	0.00290249
	ACTG1P22	-1.90091	0.00282514
	AL023583.1	-1.48819	0.00878821
	LINC02084	-1.30651	0.00113554
	CD24	1.79383	0.000410138
	AC022001.3	-1.49288	0.00763501
	AL590560.3	-1.23182	0.0018975
	AP000525.1	-1.2436	0.00996132
	AC022392.1	-1.63444	0.0073956
	AC097065.2	2.71177	0.00122387
	AL355312.3	-2.57454	0.000173656
	AL360219.2	-1.5579	0.0069327
	LHX1	-1.54962	0.00514311
	AC024337.2	-1.58857	0.000393356
	AC022898.2	-2.23364	0.000847845
	CASTOR2	1.10142	0.0030312
	H2AB1	-3.40522	0.00041211
	AC011815.2	1.11249	0.00492574
	ADRA2B	-1.11781	0.00199592
	AC007671.1	-2.62299	0.000127722
	LINC01297	-2.51082	0.0053369
	C7orf77	-3.15109	0.00326105
	CCL18	-1.27357	0.00403649
	AC018695.6	2.21247	0.00850022
	AC026461.4	-2.6692	0.0039278
	AL121985.3	1.07002	0.00674351
	PCDHGB5	1.32204	0.00892337
	AC245884.12	-2.50755	0.000268272
	AC002401.4	-1.67802	0.00749718
	MIR8071-2	-2.07156	0.00270022
	AC012409.3	-1.97085	0.00461463
	LINC02338	-2.47054	0.00792946
	RNVU1-4	-1.25673	0.00997231
	LUNAR1	-2.73335	9.19024e-05
	AC022483.3	2.69697	0.0098496
	AC025678.3	-1.37177	0.00642409
	AC007614.1	-3.67546	0.00284623
	AC015883.1	-2.05498	0.0050324
	AC011474.4	-2.3693	0.00946545
	AC138466.4	-2.02162	0.00948612
	AL445437.1	1.70777	0.00413775
	AL353597.3	-1.74264	0.00324389
	AL161658.1	-2.56086	0.00509628
	LINC01943	-1.49561	0.00165704
ESCA	HSPB6	1.23748	0.0014266
	ASB4	-1.35804	0.00945455
	SLC13A2	-1.672	0.00667405
	CEACAM7	-1.5801	0.00637348
	CD79B	1.12734	0.000486465
	TKTL1	1.79477	0.00353959
	FMO1	1.27384	1.91925e-05
	CD22	1.61606	2.83883e-06
	ATP1A2	1.78756	1.8818e-05
	CPS1	-3.2751	2.48219e-12
	FHL1	1.13315	0.000210151
	ABCC2	-1.09493	0.00933509
	MYOC	3.06891	1.18449e-08
	CDH10	1.80345	0.00399335
	MAGEC2	3.26804	0.000355865
	NEXMIF	1.6565	8.23778e-05
	CHRDL2	1.246	0.00196857
	COL11A1	1.93696	3.08671e-05
	CCN5	1.78361	2.33796e-05
	MYLK	1.62543	8.83228e-11
	RASGRP2	1.00101	4.14141e-05
	PYGM	1.24663	9.60483e-06
	CDH19	1.39558	0.00618926
	SPEG	1.08881	0.000165446
	IRAG1	1.0709	3.70942e-05
	CYP2W1	-1.57054	0.00165473
	GSDMB	-1.1149	0.00143354
	WSCD2	2.03425	1.98583e-05
	KCNQ2	1.52845	0.00053294
	TACR2	1.85366	1.08572e-09
	PPP1R12B	1.11546	2.05753e-05
	ACTN2	1.59903	5.18367e-06
	AMPH	1.00015	0.000737603
	ADCY2	1.34878	0.00014428
	ADCYAP1R1	1.23144	0.000139133
	CLUL1	1.21882	0.000280076
	RUNX1T1	1.15512	5.24081e-06
	TNS1	1.19688	3.99414e-06
	SCGN	1.81196	0.00883888
	RIMS1	2.06704	2.95448e-07
	PGR	1.28082	1.5463e-05
	C1QTNF3	1.13362	1.16993e-05
	KCNK2	1.55227	0.00161108
	ACHE	-1.75669	2.27469e-05
	PHACTR3	-1.48464	0.000825913
	SLC26A3	-2.18405	0.000231316
	TF	1.71504	0.000288265
	CCDC80	1.06444	0.0013595
	SORBS1	1.44036	7.79962e-07
	PGC	2.97218	4.81103e-05
	IGFALS	1.23792	6.34485e-05
	SEZ6L	1.6049	6.13734e-05
	PNPLA3	1.16472	0.000199283
	ASB2	1.10736	6.16137e-05
	TCL1A	2.15323	4.87122e-05
	CHRNA4	1.21812	0.00256928
	MYL9	1.37842	7.33574e-07
	CELF4	1.29416	1.8818e-05
	CHRDL1	1.88625	0.0001962
	RASL12	1.11713	9.28425e-06
	SCG3	1.59851	0.000183662
	NEFM	1.77834	0.000451672
	SLC17A7	1.02624	7.54759e-05
	FCER2	1.96859	1.26315e-06
	APLP1	1.26049	0.000451672
	ICAM5	1.14302	0.00084093
	COMP	1.34634	0.00417026
	ATP4A	2.93462	1.02128e-10
	MAG	1.35363	0.00225754
	GRIK5	1.02929	0.00014428
	NOBOX	1.83948	0.00835904
	MEOX2	1.25627	4.6375e-05
	MYL7	2.56613	2.53089e-06
	PRUNE2	1.48099	0.000288265
	OGN	1.46181	8.8323e-05
	ELAVL2	1.62349	5.87303e-05
	SH3GL2	1.98876	5.65442e-05
	PTGDS	1.00182	0.00455534
	CXCL12	1.00542	0.000825913
	ACTA2	1.11938	1.15983e-05
	SORCS1	2.17022	1.87982e-07
	CNTNAP1	1.0106	2.65431e-06
	COL1A1	1.00026	0.00121599
	SGCA	1.48326	1.4374e-05
	VTN	2.35234	1.11068e-09
	SOD3	1.11504	0.000113646
	FOLR1	1.47949	0.00811683
	IL17A	-1.7019	0.000906987
	IL17F	-1.51776	0.00498306
	KHDRBS2	1.48086	0.00562937
	VNN1	-1.5307	0.00309518
	UNC93A	-1.37446	0.000987049
	PCDHB6	1.25592	0.00445514
	THBS4	1.7192	4.78307e-05
	SLC27A6	2.03434	6.76519e-06
	C9	1.33764	0.00332823
	CNTN3	2.08531	1.60759e-08
	SERPINI2	1.34681	0.00635788
	SLC5A7	1.63441	0.00552859
	TPO	1.1716	0.00249079
	PROC	1.01358	0.00340949
	GRIN3B	1.39469	8.39778e-05
	TPSG1	1.13528	0.00407147
	ANGPTL1	1.59014	6.95128e-06
	CHD5	1.42391	1.92774e-05
	OPRD1	1.26583	0.00076228
	FBXO2	1.04491	0.00283255
	PRG4	1.07145	0.000319803
	ZNF541	1.78578	6.66022e-08
	SLC8A2	1.32996	3.31204e-05
	MYB	-1.2552	0.00124065
	GHRH	3.47634	6.85944e-06
	CASQ2	1.73547	1.4371e-05
	ABCG2	-1.06616	0.000504185
	ECRG4	1.92997	1.15983e-05
	SMAD9	1.27673	1.31189e-06
	POPDC2	1.02667	1.93841e-06
	SLITRK3	1.44172	0.00591633
	LDB3	1.51195	5.29525e-07
	PTGFR	1.03263	0.000846694
	CNTFR	1.27847	0.0046931
	COL10A1	1.28642	0.00393343
	PLP1	2.34739	8.87691e-09
	CTCFL	2.5575	4.14294e-06
	PCK1	-2.07691	0.000332731
	MAGEA10	2.23849	0.00868744
	GRM4	1.37224	0.00139236
	C3	1.0483	0.00613208
	PCSK2	1.95647	1.55046e-05
	TSKS	1.45816	0.00308762
	AVPR2	1.14398	1.42852e-05
	TMEM35A	1.47356	8.2944e-05
	OMD	1.19638	0.0034149
	EDN2	1.28932	0.00467041
	CRYGN	1.06915	0.00367371
	PLA2G5	1.1529	9.33021e-05
	ZNF835	1.14203	2.3029e-06
	FGL2	1.24146	9.12875e-05
	VPREB3	1.30984	7.54759e-05
	MCHR1	1.11747	0.000451672
	IGLL1	1.41487	0.00216238
	FLNC	1.55818	1.67378e-06
[truncated: 17,609 more rows]
